# Supplementary material for: Lactate Activates AMPK Remodeling of the Cellular Metabolic Profile and Promotes the Proliferation and Differentiation of C2C12 Myoblasts
Source: MDPI journal article supplement (doi:10.3390/ijms232213996), 2022-11-13
Supplement: s1 [file s1]

## Supplementary Materials

# Lactate Activates AMPK Remodeling of the Cellular Metabolic Profile and Promotes the Proliferation and Differentiation of C2C12 Myoblasts

Yu Zhou <sup>1,†</sup>, Xi Liu <sup>1,†</sup>, Caihua Huang <sup>2</sup> and Donghai Lin <sup>1,\*</sup>

<sup>1</sup> Key Laboratory for Chemical Biology of Fujian Province, MOE Key Laboratory of Spectrochemical Analysis and Instrumentation, College of Chemistry and Chemical Engineering, Xiamen University

<sup>2</sup> Research and Communication Center of Exercise and Health, Xiamen University of Technology, Xiamen 361024, China

\* Correspondence: [dhlin@xmu.edu.cn](mailto:dhlin@xmu.edu.cn)

† These authors contributed equally to this work.

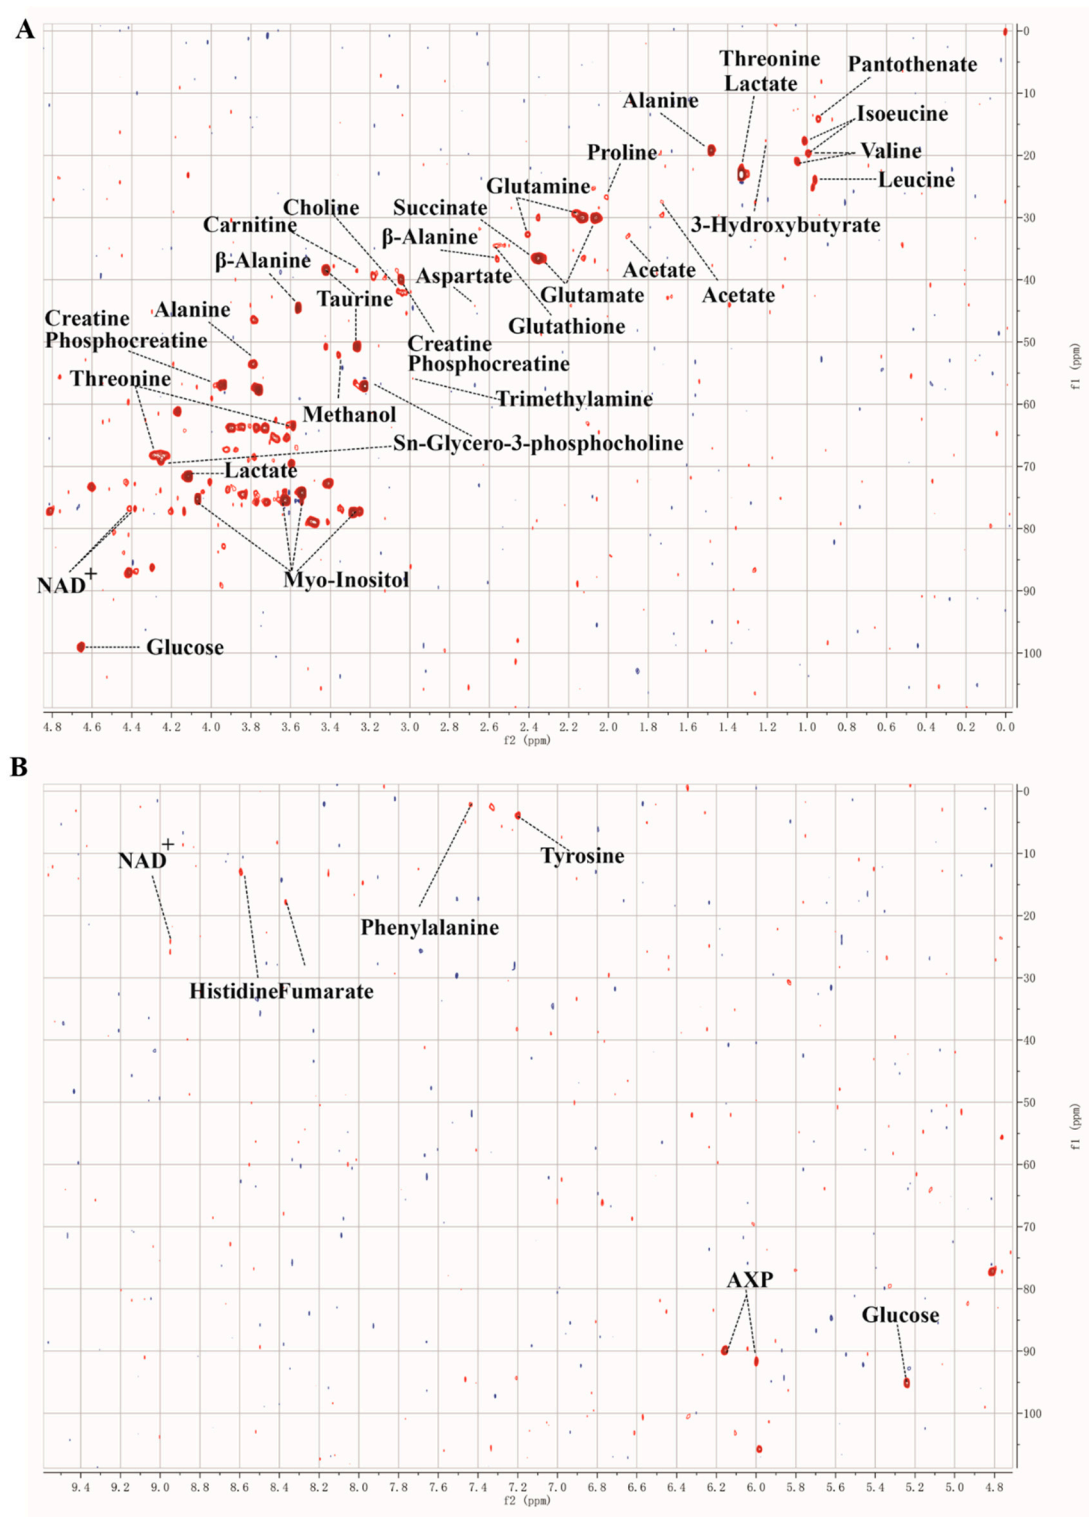

**Figure S1.** Representative 2D  $^1\text{H}$ - $^{13}\text{C}$  HSQC spectra of aqueous extracts derived from C2C12 myoblasts recorded on an 850 MHz NMR spectrometer. Selected regions of 0.0-4.8 ppm (A), 4.8-9.6 ppm (B).

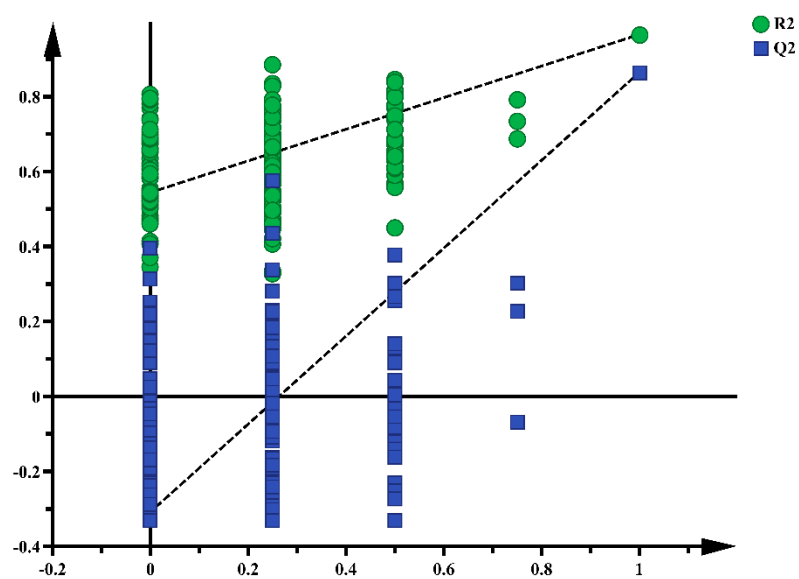

**Figure S2.** Permutation test of the PLS-DA model for the 1D  $^1\text{H}$ -NMR spectra recorded from aqueous extracts derived from C2C12 myoblasts with or without lactate supplementation (n=200).

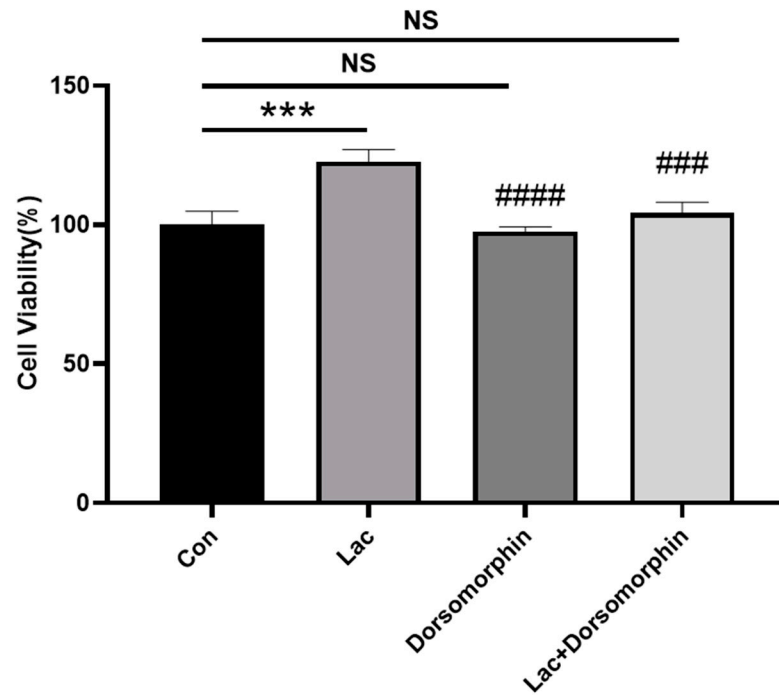

Figure S3. Viabilities of C2C12 cells with different treatments (lactate, dorsomorphin and lac+dorsomorphin) relative to controls measured by the MTS assay (n = 10). \*: Con *vs.* Lac, #: *vs.* Lac.  $p < 0.001$  (\*\*), and  $p < 0.001$  (##),  $p < 0.0001$  (###),  $p > 0.05$  (NS).

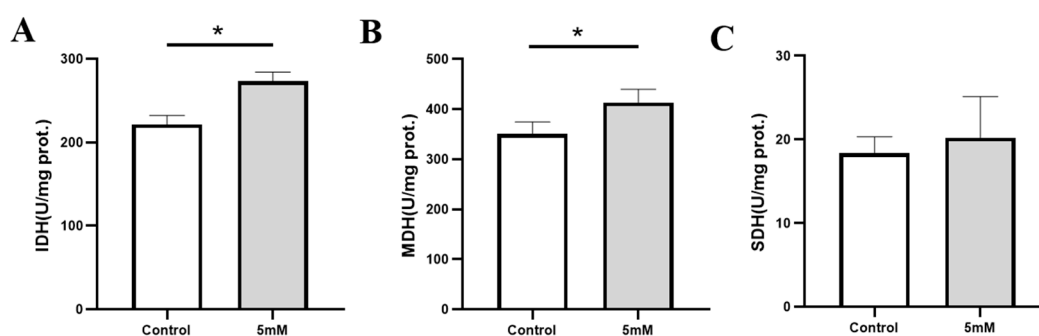

**Figure S4.** Enzymatic activities of three metabolic enzymes in the TCA cycle with and without 5 mM lactate supplementation. (A) isocitrate dehydrogenase (IDH); (B) malate dehydrogenase (MDH); and (C) succinate dehydrogenase (SDH).  $n=5$  for each group.  $p < 0.05$  (\*).

**Table S1.** Resonance assignments of metabolites in 1D  $^1\text{H}$ -NMR Spectra of C2C12 myoblasts

| NO | Metabolites       | $\delta$ $^1\text{H}$ (ppm) and multiplicity                     | Moieties                                                                                                                                                     |
|----|-------------------|------------------------------------------------------------------|--------------------------------------------------------------------------------------------------------------------------------------------------------------|
| 1  | Pantothenate      | 0.88(s), 0.92(s)                                                 | $\text{CH}_3$ , $\text{CH}_3$                                                                                                                                |
| 2  | Leucine           | 0.96(d), 0.97(d), 1.69(m), 1.70(m),<br>1.73(m), 3.73(m)          | $\alpha$ - $\text{CH}_3$ , $\alpha$ - $\text{CH}_3$ , $\gamma$ -CH, $\beta$ - $\text{CH}_2$ , $\alpha$ -CH                                                   |
| 3  | Isoleucine        | 0.94(t), 1.01(d), 1.21(m), 1.42(m),<br>2.00(m), 3.67(d)          | $\delta$ - $\text{CH}_3$ , $\gamma$ - $\text{CH}_3$ , half $\gamma$ - $\text{CH}_2$ , half $\gamma$ -<br>$\text{CH}_2$ , $\beta$ -CH, $\alpha$ -CH           |
| 4  | Valine            | 0.99(d), 1.05(d), 2.26(m), 3.60(d)                               | $\gamma$ - $\text{CH}_3$ , $\gamma$ - $\text{CH}_3$ , $\beta$ -CH, $\alpha$ -CH                                                                              |
| 5  | Ethanol           | 1.17(t), 3.65(q)                                                 | $\delta$ - $\text{CH}_3$ , $\text{CH}_2$                                                                                                                     |
| 6  | 3-Hydroxybutyrate | 1.20(d), 2.30(q), 2.39(q), 4.14(m)                               | $\gamma$ - $\text{CH}_3$ , $\beta$ - $\text{CH}_2$ , $\gamma$ -CH                                                                                            |
| 7  | Alanine           | 1.47(d), 3.78(q)                                                 | $\beta$ - $\text{CH}_3$ , $\alpha$ -CH                                                                                                                       |
| 8  | Acetate           | 1.91(s)                                                          | $\text{CH}_3$                                                                                                                                                |
| 9  | Proline           | 1.99(m)                                                          | $\gamma$ - $\text{CH}_2$                                                                                                                                     |
| 10 | Glutamate         | 2.08(m), 2.12(m), 2.34(m), 2.37(m),<br>3.75(m)                   | half $\beta$ - $\text{CH}_2$ , half $\beta$ - $\text{CH}_2$ , half $\gamma$ - $\text{CH}_2$ ,<br>half $\gamma$ - $\text{CH}_2$ , $\alpha$ -CH                |
| 11 | Succinate         | 2.41(s)                                                          | CH                                                                                                                                                           |
| 12 | Glutamine         | 2.13(m), 2.45(m), 3.77(t)                                        | $\gamma$ - $\text{CH}_2$ , $\beta$ - $\text{CH}_2$ , $\alpha$ -CH                                                                                            |
| 13 | Methionine        | 1.98(m), 2.13(s), 2.17(m), 2.66(dd),<br>3.78(m)                  | $\delta$ - $\text{CH}_3$ , $\gamma$ - $\text{CH}_2$ , $\beta$ - $\text{CH}_2$                                                                                |
| 14 | Aspartate         | 2.68(dd), 2.81(dd), 3.90(dd)                                     | $\beta$ - $\text{CH}_2$ , $\alpha$ -CH                                                                                                                       |
| 15 | Asparagine        | 2.84(dd), 2.94(dd), 4.00(dd)                                     | half $\beta$ -CH, half $\beta$ -CH, $\alpha$ -CH                                                                                                             |
| 16 | Trimethylamine    | 2.88(s)                                                          | $\text{CH}_3$                                                                                                                                                |
| 17 | Glutathione       | 2.15(m), 2.55(m), 2.96(m), 3.77(m),<br>4.56(m)                   | $\beta$ - $\text{CH}_2$ , $\gamma$ - $\text{CH}_2$ , $\text{CH}_2$ -SH, $\alpha$ -<br>$\text{CH}$ & $\text{CH}_2$ -NH, CH-NH                                 |
| 18 | Lysine            | 1.43(m), 1.50(m), 1.73(m), 1.89(m),<br>1.92(m), 3.02(t), 3.75(t) | $\gamma$ - $\text{CH}_2$ , half $\gamma$ - $\text{CH}_2$ , $\delta$ - $\text{CH}_2$ , $\beta$ - $\text{CH}_2$ ,<br>$\epsilon$ - $\text{CH}_2$ , $\alpha$ -CH |
| 19 | Creatine          | 3.04(s), 3.93(s)                                                 | N- $\text{CH}_3$ , $\alpha$ - $\text{CH}_2$                                                                                                                  |

|    |                             |                                                                                |                                                                                                                                                                                                                                                    |
|----|-----------------------------|--------------------------------------------------------------------------------|----------------------------------------------------------------------------------------------------------------------------------------------------------------------------------------------------------------------------------------------------|
| 20 | Phosphocreatine             | 3.05(s), 4.05(s)                                                               | N-CH <sub>3</sub> , CH <sub>2</sub>                                                                                                                                                                                                                |
| 21 | β-Alanine                   | 2.54(t), 3.17(t)                                                               | CH <sub>2</sub> , CH <sub>2</sub>                                                                                                                                                                                                                  |
| 22 | Choline                     | 3.20(s), 3.50 (dd), 4.03(t)                                                    | N-(CH <sub>3</sub> ) <sub>3</sub> , N-CH <sub>2</sub> , CH <sub>2</sub> OH                                                                                                                                                                         |
| 23 | Methanol                    | 3.34(s)                                                                        | CH <sub>3</sub>                                                                                                                                                                                                                                    |
| 24 | Carnitine                   | 3.21(s)                                                                        | CH <sub>3</sub>                                                                                                                                                                                                                                    |
| 25 | Sn-Glycero-3-phosphocholine | 3.23(s), 3.60(dd), 3.68(dd), 3.87(m),<br>3.94(m), 4.33(m)                      | N-(CH <sub>3</sub> ) <sub>3</sub> , half <sup>1</sup> CH <sub>2</sub> , <sup>2</sup> CH <sub>2</sub> , half<br><sup>1</sup> CH <sub>2</sub> , half <sup>3</sup> CH <sub>2</sub> , half <sup>3</sup> CH <sub>2</sub> , <sup>1</sup> CH <sub>2</sub> |
| 26 | Taurine                     | 3.24(t), 3.41(t)                                                               | <sup>1</sup> CH <sub>2</sub> , <sup>2</sup> CH <sub>2</sub>                                                                                                                                                                                        |
| 27 | Myo-Inositol                | 3.28(t), 3.53 (dd), 3.63(t), 4.07(t)                                           | <sup>2</sup> CH, <sup>4,6</sup> CH, <sup>1,3</sup> CH, <sup>5</sup> CH                                                                                                                                                                             |
| 28 | Glycine                     | 3.57(s)                                                                        | α-CH <sub>2</sub>                                                                                                                                                                                                                                  |
| 29 | Threonine                   | 1.31(d), 3.59(d), 4.25(m)                                                      | γ-CH <sub>2</sub> , β-CH                                                                                                                                                                                                                           |
| 30 | Lactate                     | 1.33(d), 4.11(q)                                                               | β-CH <sub>3</sub> , α-CH                                                                                                                                                                                                                           |
| 31 | NAD <sup>+</sup>            | 6.03(d), 6.08(s), 8.16(s), 8.20(m), 8.41(s),<br>8.82(d), 9.13(d), 9.32(s)      | NH <sub>2</sub> , NH <sub>2</sub> (CO), δ-CH, β-CH, <sup>2</sup> CH,<br>γ-CH, α-CH                                                                                                                                                                 |
| 32 | AXP                         | 6.14 (d), 8.27 (s), 8.58 (s)                                                   | NH <sub>2</sub> , δ-CH, <sup>2</sup> CH                                                                                                                                                                                                            |
| 33 | Glucose                     | β(3.24 (dd), 3.48(t), 3.90 (dd)), α(3.54<br>(dd), 3.71(t), 3.72 (dd), 3.83(m)) | β(H2, H3, H5), α(H2, H3, H6)                                                                                                                                                                                                                       |
| 34 | Fumarate                    | 8.46(s)                                                                        | CH                                                                                                                                                                                                                                                 |
| 35 | Histidine                   | 7.06(s), 7.85(s)                                                               | <sup>5</sup> CH <sub>2</sub> , <sup>2</sup> CH                                                                                                                                                                                                     |
| 36 | Tyrosine                    | 3.05(dd), 3.19(dd), 6.92(d), 7.19(d)                                           | half β-CH <sub>2</sub> , half β-CH <sub>2</sub> , β-CH, α-<br>CH                                                                                                                                                                                   |
| 37 | Phenylalanine               | 3.12(dd), 3.30(dd), 3.99(dd), 7.33(d),<br>7.37(t), 7.43(t)                     | α-CH, half β-CH <sub>2</sub> , half β-CH <sub>2</sub> , α-<br>CH, β-CH, γ-CH                                                                                                                                                                       |

**Table S2.** Relative levels of metabolites calculated from 1D <sup>1</sup>H-NMR spectra of aqueous metabolites extracted from the two groups of C2C12 myoblasts

| Metabolites     | Mean ± SD   |             | Lac vs.<br>Con | <i>t</i> -test |       |
|-----------------|-------------|-------------|----------------|----------------|-------|
|                 | Control     | Lactate     |                | F              | p     |
| Pantothenate    | 0.117±0.098 | 0.067±0.008 | NS             | 4.374          | 0.177 |
| Leucine         | 0.816±0.077 | 0.784±0.033 | NS             | 1.536          | 0.304 |
| Isoleucine      | 0.376±0.020 | 0.364±0.015 | NS             | 0.896          | 0.193 |
| Valine          | 0.388±0.014 | 0.385±0.016 | NS             | 0.840          | 0.647 |
| Ethanol         | 0.056±0.012 | 0.067±0.014 | NS             | 0.066          | 0.122 |
| Hydroxybutyrate | 0.025±0.015 | 0.042±0.025 | NS             | 2.668          | 0.115 |
| Alanine         | 4.065±0.120 | 4.418±0.086 | ↑↑↑            | 2.108          | 0.000 |
| Acetate         | 0.176±0.038 | 0.151±0.035 | NS             | 0.066          | 0.190 |
| Proline         | 0.622±0.047 | 0.643±0.037 | NS             | 0.623          | 0.332 |
| Glutamate       | 3.637±0.086 | 3.764±0.102 | ↑              | 0.171          | 0.017 |
| Succinate       | 0.181±0.013 | 0.163±0.008 | ↓↓             | 2.015          | 0.004 |
| Glutamine       | 1.468±0.085 | 1.623±0.047 | ↑↑↑            | 4.037          | 0.000 |
| Methionine      | 0.109±0.005 | 0.113±0.003 | NS             | 6.751          | 0.147 |
| Aspartate       | 0.060±0.013 | 0.051±0.014 | NS             | 0.281          | 0.203 |
| Asparagine      | 0.019±0.007 | 0.018±0.008 | NS             | 0.254          | 0.760 |
| Trimethylamine  | 0.004±0.002 | 0.005±0.002 | NS             | 0.077          | 0.681 |

|                             |             |             |     |       |       |
|-----------------------------|-------------|-------------|-----|-------|-------|
| Glutathione                 | 0.578±0.044 | 0.615±0.023 | NS  | 2.563 | 0.057 |
| Lysine                      | 0.092±0.009 | 0.097±0.006 | NS  | 1.066 | 0.222 |
| Creatine                    | 1.635±0.099 | 1.541±0.125 | NS  | 0.455 | 0.120 |
| Phosphocreatine             | 1.052±0.088 | 1.186±0.101 | ↑   | 0.004 | 0.013 |
| carnitine                   | 1.634±0.099 | 1.541±0.125 | NS  | 0.455 | 0.120 |
| β-Alanine                   | 0.440±0.020 | 0.452±0.012 | NS  | 1.998 | 0.186 |
| Choline                     | 0.096±0.010 | 0.103±0.006 | NS  | 2.059 | 0.082 |
| Sn-Glycero-3-phosphocholine | 1.231±0.103 | 1.443±0.048 | ↑↑↑ | 4.732 | 0.000 |
| Methanol                    | 0.980±0.164 | 1.316±0.597 | NS  | 4.340 | 0.147 |
| Taurine                     | 2.387±0.063 | 2.431±0.044 | NS  | 1.951 | 0.133 |
| MyoInositol                 | 2.921±0.114 | 3.447±0.069 | ↑↑↑ | 1.755 | 0.000 |
| Glycine                     | 2.878±0.048 | 3.032±0.061 | ↑↑↑ | 0.970 | 0.000 |
| Threonine                   | 0.221±0.020 | 0.209±0.001 | NS  | 8.299 | 0.141 |
| Lactate                     | 1.751±0.240 | 1.938±0.068 | NS  | 6.297 | 0.066 |
| NAD <sup>+</sup>            | 0.035±0.003 | 0.039±0.003 | ↑   | 0.153 | 0.019 |
| AXP                         | 0.614±0.019 | 0.598±0.017 | NS  | 0.157 | 0.089 |
| Glucose                     | 0.079±0.029 | 0.075±0.014 | NS  | 2.316 | 0.711 |
| Fumarate                    | 0.010±0.002 | 0.009±0.001 | NS  | 1.028 | 0.600 |
| Methylhistidine             | 0.017±0.001 | 0.018±0.001 | NS  | 0.079 | 0.107 |
| Tyrosine                    | 0.177±0.007 | 0.179±0.005 | NS  | 1.103 | 0.470 |
| Phenylalanine               | 0.134±0.006 | 0.137±0.004 | NS  | 1.895 | 0.250 |

PS: ↑/↓:  $p < 0.05$ , ↑↑/↓↓:  $p < 0.01$ , ↑↑↑/↓↓↓:  $p < 0.001$ , Red and blue represent upregulation and downregulation, respectively.

**Table S3.** Significantly altered metabolic pathways in lactate-treated C2C12 myoblasts relative to controls.

| NO | Metabolic Pathway                           | <i>P</i> -values | Impact values |
|----|---------------------------------------------|------------------|---------------|
| 1  | alanine, aspartate and glutamate metabolism | 0.000449         | 0.3109        |
| 2  | D-Glutamine and D-glutamate metabolism      | 0.000471         | 0.5           |
| 3  | glyoxylate and dicarboxylate metabolism     | 0.000672         | 0.10582       |
| 4  | arginine biosynthesis                       | 0.002785         | 0.11675       |
| 5  | glutathione metabolism                      | 0.011075         | 0.10839       |
